# Supplementary material for: Clinical Outcomes and Predictors of Response for Adalimumab in Patients with Moderately to Severely Active Ulcerative Colitis: A KASID Prospective Multicenter Cohort Study
Source: Research Square preprint supplement (doi:10.21203/rs.3.rs-110002/v1), 2020-11-25
Supplement: Supplementary file 2 [file 8d3d2898f31152f85f5acde5.docx]

Supplementary Tables

Supplementary table S1. Patients who discontinued adalimumab and related reasons

| Related reason | N = 62, n (%) |
| --- | --- |
| Lack of efficacy | 34 (54.8) |
| Adverse event | 11 (17.7) |
| Follow-up loss | 9 (14.5) |
| Subject's decision | 6 (9.7) |
| Pregnancy | 1 (1.6) |
| Others | 1 (1.6) |

Supplementary table S2. Adverse drug reactions with adalimumab

| Adverse drug reaction, n (%) | N = 146 |
| --- | --- |
| **Gastrointestinal disorders** | 3 (2.1) |
| Hematochezia | 2 (1.4) |
| Abdominal pain | 1 (0.7) |
| **Infections and infestations** | 3 (2.1) |
| Cytomegalovirus infection | 1 (0.7) |
| Pneumonia | 1 (0.7) |
| Pulmonary tuberculosis | 1 (0.7) |
| **General disorders and administration site conditions** | 1 (0.7) |
| Injection site reaction | 1 (0.7) |
| **Renal and urinary disorders** | 1 (0.7) |
| Renal failure | 1 (0.7) |
| **Skin and subcutaneous tissue disorders** | 1 (0.7) |
| Swelling face | 1 (0.7) |
| Total | 9 (6.2) |
| Severe adverse drug reaction, n (%) |  |
| **Gastrointestinal disorders** | 1 (0.7) |
| Abdominal pain | 1 (0.7) |
| **Infections and infestations** | 2 (1.4) |
| Pneumonia | 1 (0.7) |
| Pulmonary tuberculosis | 1 (0.7) |
| **Renal and urinary disorders** | 1 (0.7) |
| Renal failure | 1 (0.7) |
| Total | 4 (2.8) |

Supplementary Figure legends

**Supplementary Figure 1. Proportion of patients remaining on adalimumab during the follow-up period**

**Supplementary Figure 2. Proportion of patients with clinical response and remission according to partial Mayo clinic score**
